# Supplementary material
Source: MDPI journal article supplement (https://www.mdpi.com/2218-1997/8/11/550)
Supplement: s1 [file s1]

## Article

# The Brahmavarta Initiative: A Roadmap for the First Self-Sustaining City-State on Mars: Supplementary Material

Arvind Mukundan and Hsiang-Chen Wang \*

**Citation:** Mukundan, A.; Wang, H.-C. The Brahmavarta Initiative: A Roadmap for the First Self-Sustaining City-State on Mars. *Universe* **2022**, *8*, 550. <https://doi.org/10.3390/universe8110550>

Academic Editor: Roman Ya Kezerashvili

Received: 14 August 2022

Accepted: 19 October 2022

Published: 23 October 2022

**Publisher's Note:** MDPI stays neutral with regard to jurisdictional claims in published maps and institutional affiliations.

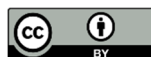

**Copyright:** © 2022 by the authors. Licensee MDPI, Basel, Switzerland. This article is an open access article distributed under the terms and conditions of the Creative Commons Attribution (CC BY) license (<https://creativecommons.org/licenses/by/4.0/>).

Department of Mechanical Engineering, Advanced Institute of Manufacturing with High tech Innovations (AIM-HI) and Center for Innovative Research on Aging Society (CIRAS), National Chung Cheng University, 168, University Rd., Min Hsiung, Chia Yi 62102, Taiwan

\* Correspondence: [hcwang@ccu.edu.tw](mailto:hcwang@ccu.edu.tw) (H.-C.W).

This article provides the supplementary files for the article “The Brahmavarta Initiative: A Roadmap for the First Self-Sustaining City-State on Mars”.

## Supplementary Materials S1. Broadcasting

Table S1. Revenue generated from broadcasting

| Broadcasting                                         |                      |        |
|------------------------------------------------------|----------------------|--------|
| Revenue Generated                                    | \$ 183,333,333.00    | /Event |
| Number of Launch Events On Earth                     | 6                    | /Year  |
| Number of Sporting Events on Mars                    | 156                  | /Year  |
| Total Revenue Generated in the Pre-Initiative Phase  | \$ 1,099,999,998.00  | /Year  |
| Total Revenue Generated in the Self-Sustaining Phase | \$ 29,699,999,946.00 | /Year  |

## Supplementary Materials S2. Martian Soil

Table S2. Revenue generated from Mars Soil

| Selling Martian Soil for Research |                        |                  |    |
|-----------------------------------|------------------------|------------------|----|
| 1gram of Lunar dust =             |                        | 200,000.00       | \$ |
| 1 Kg of Lunar Dust =              |                        | 200,000,000.00   | \$ |
| Cost for Transporting 1 kg =      |                        | 200.00           | \$ |
|                                   |                        |                  |    |
| Organizations                     | Number of Kg each year | Cost             |    |
| ESA Gets 1KG                      | 1                      | 200,000,000.00   | \$ |
| NASA Gets 1KG                     | 1                      | 200,000,000.00   | \$ |
| JAXA Gets 1KG                     | 1                      | 200,000,000.00   | \$ |
| ISRO Gets 1KG                     | 1                      | 200,000,000.00   | \$ |
| ROSCOSMOS Gets 1KG                | 1                      | 200,000,000.00   | \$ |
| SPACEX Gets 1KG                   | 1                      | 200,000,000.00   | \$ |
| CNSA Gets 1KG                     | 1                      | 200,000,000.00   | \$ |
| CSA Gets 1KG                      | 1                      | 200,000,000.00   | \$ |
| ASA Gets 1KG                      | 1                      | 200,000,000.00   | \$ |
| Misc Gets 5KG                     | 5                      | 1,000,000,000.00 | \$ |
| Universities Get 1KG              | 1                      | 200,000,000.00   | \$ |
| Total Sold =                      | 15                     | 3,000,000,000.00 |    |
| Total Cost of Transporting =      |                        | 3,000.00         |    |
|                                   |                        |                  |    |
| Total Revenue Generated =         |                        | 2,999,997,000.00 | \$ |



**Supplementary Materials S4. BEA Analysis**

Table S4. Break even analysis economic plan of the initiative

|      | Expenditure | Income            | Balance           | Settlement profits | Settlement balance |
|------|-------------|-------------------|-------------------|--------------------|--------------------|
| 2025 | 0           |                   | 0                 | 0                  | 0                  |
| 2026 | 800000000   |                   | 9920000000        | -800000000         | -800000000         |
| 2027 | 800000000   |                   | 9840000000        | -800000000         | -1600000000        |
| 2028 | 800000000   |                   | 9760000000        | -800000000         | -2400000000        |
| 2029 | 800000000   |                   | 9680000000        | -800000000         | -3200000000        |
| 2030 | 800000000   |                   | 9600000000        | -800000000         | -4000000000        |
| 2031 | 800000000   |                   | 9520000000        | -800000000         | -4800000000        |
| 2032 | 800000000   |                   | 9440000000        | -800000000         | -5600000000        |
| 2033 | 800000000   |                   | 9360000000        | -800000000         | -6400000000        |
| 2034 | 9200000000  | 746575239.1       | 85146575239       | -8453424761        | -14853424761       |
| 2035 | 9000000000  | 746575239.1       | 76893150478       | -8253424761        | -23106849522       |
| 2036 | 9200000000  | 746575239.1       | 68439725717       | -8453424761        | -31560274283       |
| 2037 | 9000000000  | 746575239.1       | 60186300956       | -8253424761        | -39813699044       |
| 2038 | 9200000000  | 746575239.1       | 51732876195       | -8453424761        | -48267123805       |
| 2039 | 9000000000  | 746575239.1       | 43479451434       | -8253424761        | -56520548566       |
| 2040 | 9200000000  | 746575239.1       | 35026026673       | -8453424761        | -64973973327       |
| 2041 | 9000000000  | 746575239.1       | 26772601912       | -8253424761        | -73227398088       |
| 2042 | 14200000000 | 13244764391       | 25817366304       | -955235608.9       | -74182633696       |
| 2043 | 9000000000  | 746575239.1       | 17563941543       | -8253424761        | -82436058457       |
| 2044 | 9000000000  | 15536431058       | 24100372600       | 6536431058         | -75899627400       |
| 2045 | 9000000000  | 746575239.1       | 15846947839       | -8253424761        | -84153052161       |
| 2046 | 9000000000  | 15536431058       | 22383378897       | 6536431058         | -77616621103       |
| 2047 | 9000000000  | 746575239.1       | 14129954136       | -8253424761        | -85870045864       |
| 2048 | 9000000000  | 21,344,439,747.73 | 26,474,393,883.92 | 12,344,439,747.73  | -73,525,606,116.08 |

Supplementary Materials S5. Colony Fuel Usage  
Table S5. Calculations for Colony Fuel Usage.

| COLONY FUEL USAGE                           |             |    |         |   |     |   |      |  |   |
|---------------------------------------------|-------------|----|---------|---|-----|---|------|--|---|
| Fuel Needed for Tourism and Research        | 4946110.405 |    |         |   |     |   |      |  |   |
| =                                           |             |    |         |   |     |   |      |  |   |
| Fuel Needed for Deuterium =                 | 335177.7675 |    |         |   |     |   |      |  |   |
| Fuel Needed for asteroid Mining =           | 2762500     |    |         |   |     |   |      |  |   |
| Fuel Needed to send Platinum =              | 72852862.5  |    |         |   |     |   |      |  |   |
| Total Fuel Used Every year =                | 80896650.67 | kg |         |   |     |   |      |  |   |
| Total Fuel Needs to be produced every day = | 221634.6594 |    |         |   |     |   |      |  |   |
| Total Methane required =                    | 49252.14653 |    |         |   |     |   |      |  |   |
| Total Oxygen Required =                     | 172382.5128 |    |         |   |     |   |      |  |   |
| Water Consumption needed by a person =      | 8           | kg | per day |   |     |   |      |  |   |
| With Margin                                 | 9.6         | kg | per day |   |     |   |      |  |   |
| For 13000 people                            | 1248000     | kg | per day |   |     |   |      |  |   |
| Mol Mass of CO2                             | 44.01       |    |         |   |     |   |      |  |   |
| Mol Mass of H2                              | 2.01588     |    |         |   |     |   |      |  |   |
| Mol Mass of CH4                             | 16.04       |    |         |   |     |   |      |  |   |
| Mol Mass of H2O                             | 18.01528    |    |         |   |     |   |      |  |   |
| Reaction =                                  | CO2         | +  | 4 H2    | = | CH4 | + | 2H2O |  |   |
| Number of Molecules                         | 1           | +  |         | 4 | =   | 1 | +    |  | 2 |
| Number of Molecules of Methane in 4083      | 1.8491E+27  |    |         |   |     |   |      |  |   |

|                                     |             |             |             |             |             |             |             |             |
|-------------------------------------|-------------|-------------|-------------|-------------|-------------|-------------|-------------|-------------|
| Number of Molecules required =      | 1.8491E+27  |             | 7.39642E+27 |             | 1.8491E+27  |             | 3.69821E+27 |             |
| Kg of each molecule required =      | 135136.3447 | kg per day  | 24759.70502 | kg per day  | 49252.14653 | kg per day  | 110634.8143 | kg per day  |
|                                     | 49324765.81 | kg per year | 9037292.334 | kg per year | 17977033.48 | kg per year | 40381707.2  | kg per year |
| Methane is required everyday =      | 49252.14653 | kg          |             |             |             |             |             |             |
| Water produced everyday =           | 110634.8143 | kg          |             |             |             |             |             |             |
| One machine can dig up to =         | 68.2        | kg/hr       |             |             |             |             |             |             |
| One machine can dig up in one day = | 1691.36     | kg          |             |             |             |             |             |             |
| Water required for h2 =             | 222837.3452 | kg          |             |             |             |             |             |             |
| Number of Machines required =       | 131.7503933 |             |             |             |             |             |             |             |
| Round of Machine =                  | 132         |             |             |             |             |             |             |             |
| Oxygen produced from electrolysis = | 198077.6402 | kg          |             |             |             |             |             |             |
| Oxygen produced for fuel =          | 172382.5128 | kg          |             |             |             |             |             |             |
| Oxygen for life support =           | 25695.12734 | kg          |             |             |             |             |             |             |
| Prop Produced per year =            | 221634.6594 | kg          |             |             |             |             |             |             |
| Prop Produced every year =          | 80896650.67 | kg          |             |             |             |             |             |             |

**Supplementary Materials S6. Detailed Cost Budget**

Table S6. Detailed cost budget of the initiative.

| Colonization Status           | Year | Details                   | Outflow Cost estimation | Total Outflow        | Outflow 5% margin    | Inflow cost estimation | Total Inflow         |
|-------------------------------|------|---------------------------|-------------------------|----------------------|----------------------|------------------------|----------------------|
| <b>Pre - Initiative Phase</b> | 2024 | MADE member's investments |                         | \$ 48,232,500,000.00 | \$ 50,644,125,000.00 | \$ 8,000,000,000.00    | \$ 55,490,230,670.00 |
|                               |      | MADE infrastructure       | \$ 1,860,000,000.00     |                      |                      |                        |                      |
|                               |      | Spacecraft manufacturing  | \$ 1,500,000,000.00     |                      |                      |                        |                      |
|                               |      | MADE operating cost       | \$ 3,200,000,000.00     |                      |                      |                        |                      |
|                               | 2026 | MADE member's investments |                         |                      |                      | \$ 8,000,000,000.00    |                      |
|                               |      | MADE infrastructure       | \$ 1,860,000,000.00     |                      |                      |                        |                      |
|                               |      | MADE operating cost       | \$ 3,200,000,000.00     |                      |                      |                        |                      |
|                               |      | Spacecraft manufacturing  | \$ 1,500,000,000.00     |                      |                      |                        |                      |
|                               | 2028 | MADE member's investments |                         |                      |                      | \$ 8,000,000,000.00    |                      |
|                               |      | MADE operating cost       | \$ 3,200,000,000.00     |                      |                      |                        |                      |
|                               |      | Training program at MADE  | \$ 120,000,000.00       |                      |                      | \$ 318,733,220.00      |                      |
|                               |      | Spacecraft manufacturing  | \$ 1,500,000,000.00     |                      |                      |                        |                      |
|                               | 2030 | MADE member's investments |                         |                      |                      | \$ 8,000,000,000.00    |                      |
|                               |      | MADE operating cost       | \$ 3,200,000,000.00     |                      |                      |                        |                      |
|                               |      | Training program at MADE  | \$ 600,000,000.00       |                      |                      | \$ 1,593,666,100.00    |                      |
|                               |      | Spacecraft manufacturing  | \$ 1,500,000,000.00     |                      |                      |                        |                      |
|                               | 2032 | MADE member's investments |                         |                      |                      | \$ 8,000,000,000.00    |                      |
|                               |      | MADE operating cost       | \$ 3,200,000,000.00     |                      |                      |                        |                      |
|                               |      | Training program at MADE  | \$ 900,000,000.00       |                      |                      | \$ 2,390,499,150.00    |                      |
|                               |      | Cargo Missions            | \$ 5,140,000,000.00     |                      |                      |                        |                      |
|                               |      | Manned Missions           | \$ 1,285,000,000.00     |                      |                      |                        |                      |
|                               |      | Spacecraft manufacturing  | \$ 1,500,000,000.00     |                      |                      |                        |                      |
|                               | 2034 | MADE member's investments |                         |                      |                      | \$ 8,000,000,000.00    |                      |
|                               |      | MADE operating cost       | \$ 3,200,000,000.00     |                      |                      |                        |                      |

|                                      |      |                           |                      |                         |                         |                      |                         |
|--------------------------------------|------|---------------------------|----------------------|-------------------------|-------------------------|----------------------|-------------------------|
|                                      |      | Cargo Missions            | \$ 5,782,500,000.00  |                         |                         |                      |                         |
|                                      |      | Manned Missions           | \$ 1,285,000,000.00  |                         |                         |                      |                         |
|                                      |      | Training program at MADE  | \$ 1,200,000,000.00  |                         |                         | \$ 3,187,332,200.00  |                         |
|                                      |      | Spacecraft manufacturing  | \$ 1,500,000,000.00  |                         |                         |                      |                         |
| <b>Start of the Settlement Phase</b> |      |                           |                      |                         |                         |                      |                         |
| <b>Settlement Phase</b>              | 2036 | MADE member's investments |                      | \$ 1,037,291,500,000.00 | \$ 1,089,156,075,000.00 | \$ 8,000,000,000.00  | \$ 1,790,037,128,851.92 |
|                                      |      | MADE operating cost       | \$ 3,200,000,000.00  |                         |                         |                      |                         |
|                                      |      | Spacecraft manufacturing  | \$ 1,500,000,000.00  |                         |                         |                      |                         |
|                                      |      | Manned Missions           | \$ 1,285,000,000.00  |                         |                         |                      |                         |
|                                      |      | Broadcasting              |                      |                         |                         | \$ 1,099,999,998.00  |                         |
|                                      |      | Cargo Missions            | \$ 7,710,000,000.00  |                         |                         |                      |                         |
|                                      |      | Martian Soil              |                      |                         |                         | \$ 5,999,994,000.00  |                         |
|                                      |      | Training program at MADE  | \$ 16,152,000,000.00 |                         |                         | \$ 43,072,000,000.00 |                         |
|                                      | 2038 | MADE member's investments |                      |                         |                         | \$ 8,000,000,000.00  |                         |
|                                      |      | MADE operating cost       | \$ 3,200,000,000.00  |                         |                         |                      |                         |
|                                      |      | Spacecraft manufacturing  | \$ 1,500,000,000.00  |                         |                         |                      |                         |
|                                      |      | Manned Missions           | \$ 1,285,000,000.00  |                         |                         |                      |                         |
|                                      |      | Broadcasting              |                      |                         |                         | \$ 1,099,999,998.00  |                         |
|                                      |      | Cargo Missions            | \$ 2,570,000,000.00  |                         |                         |                      |                         |
|                                      |      | Martian Soil              |                      |                         |                         | \$ 5,999,994,000.00  |                         |
|                                      |      | Training program at MADE  | \$ 16,152,000,000.00 |                         |                         | \$ 43,072,000,000.00 |                         |
|                                      | 2040 | MADE member's investments |                      |                         |                         | \$ 8,000,000,000.00  |                         |
|                                      |      | MADE operating cost       | \$ 3,200,000,000.00  |                         |                         |                      |                         |
|                                      |      | Spacecraft manufacturing  | \$ 1,500,000,000.00  |                         |                         |                      |                         |
|                                      |      | Manned Missions           | \$ 12,850,000,000.00 |                         |                         |                      |                         |
|                                      |      | Broadcasting              |                      |                         |                         | \$ 1,099,999,998.00  |                         |
|                                      |      | Cargo Missions            | \$ 2,570,000,000.00  |                         |                         |                      |                         |



|  |      |                           |                      |  |  |                      |  |
|--|------|---------------------------|----------------------|--|--|----------------------|--|
|  |      | Martian Soil              |                      |  |  | \$ 5,999,994,000.00  |  |
|  |      | Training program at MADE  | \$ 16,152,000,000.00 |  |  | \$ 43,072,000,000.00 |  |
|  | 2042 | MADE member's investments |                      |  |  | \$ 8,000,000,000.00  |  |
|  |      | MADE operating cost       | \$ 3,200,000,000.00  |  |  |                      |  |
|  |      | Spacecraft manufacturing  | \$ 1,500,000,000.00  |  |  |                      |  |
|  |      | Manned Missions           | \$ 12,850,000,000.00 |  |  |                      |  |
|  |      | Broadcasting              |                      |  |  | \$ 1,099,999,998.00  |  |
|  |      | Cargo Missions            | \$ 5,140,000,000.00  |  |  |                      |  |
|  |      | Martian Soil              |                      |  |  | \$ 5,999,994,000.00  |  |
|  |      | Training program at MADE  | \$ 16,152,000,000.00 |  |  | \$ 43,072,000,000.00 |  |
|  | 2044 | MADE member's investments |                      |  |  | \$ 8,000,000,000.00  |  |
|  |      | MADE operating cost       | \$ 3,200,000,000.00  |  |  |                      |  |
|  |      | Spacecraft manufacturing  | \$ 1,500,000,000.00  |  |  |                      |  |
|  |      | Manned Missions           | \$ 12,850,000,000.00 |  |  |                      |  |
|  |      | Broadcasting              |                      |  |  | \$ 1,099,999,998.00  |  |
|  |      | Cargo Missions            | \$ 5,782,500,000.00  |  |  |                      |  |
|  |      | Martian Soil              |                      |  |  | \$ 5,999,994,000.00  |  |
|  |      | Training program at MADE  | \$ 16,152,000,000.00 |  |  | \$ 43,072,000,000.00 |  |
|  | 2046 | MADE member's investments |                      |  |  | \$ 8,000,000,000.00  |  |
|  |      | MADE operating cost       | \$ 3,200,000,000.00  |  |  |                      |  |
|  |      | Spacecraft manufacturing  | \$ 1,500,000,000.00  |  |  |                      |  |
|  |      | Manned Missions           | \$ 12,850,000,000.00 |  |  |                      |  |
|  |      | Broadcasting              |                      |  |  | \$ 1,099,999,998.00  |  |
|  |      | Cargo Missions            | \$ 7,710,000,000.00  |  |  |                      |  |
|  |      | Martian Soil              |                      |  |  | \$ 5,999,994,000.00  |  |
|  |      | Training program at MADE  | \$ 16,302,000,000.00 |  |  | \$ 43,472,000,000.00 |  |
|  | 2048 | MADE member's investments |                      |  |  | \$ 8,000,000,000.00  |  |

|  |      |                           |                      |  |  |                      |  |
|--|------|---------------------------|----------------------|--|--|----------------------|--|
|  |      | MADE operating cost       | \$ 3,200,000,000.00  |  |  |                      |  |
|  |      | Spacecraft manufacturing  | \$ 1,500,000,000.00  |  |  |                      |  |
|  |      | Manned Missions           | \$ 12,850,000,000.00 |  |  |                      |  |
|  |      | Broadcasting              |                      |  |  | \$ 1,099,999,998.00  |  |
|  |      | Cargo Missions            | \$ 2,570,000,000.00  |  |  |                      |  |
|  |      | Deterium Mining           |                      |  |  | \$ 746,575,239.06    |  |
|  |      | Martian Soil              |                      |  |  | \$ 5,999,994,000.00  |  |
|  |      | Training program at MADE  | \$ 16,452,000,000.00 |  |  | \$ 43,872,000,000.00 |  |
|  | 2050 | MADE member's investments |                      |  |  | \$ 8,000,000,000.00  |  |
|  |      | MADE operating cost       | \$ 3,200,000,000.00  |  |  |                      |  |
|  |      | Spacecraft manufacturing  | \$ 1,500,000,000.00  |  |  |                      |  |
|  |      | Manned Missions           | \$ 12,850,000,000.00 |  |  |                      |  |
|  |      | Broadcasting              |                      |  |  | \$ 1,099,999,998.00  |  |
|  |      | Cargo Missions            | \$ 2,570,000,000.00  |  |  |                      |  |
|  |      | Deterium Mining           |                      |  |  | \$ 746,575,239.06    |  |
|  |      | Martian Soil              |                      |  |  | \$ 5,999,994,000.00  |  |
|  |      | Training program at MADE  | \$ 16,452,000,000.00 |  |  | \$ 43,872,000,000.00 |  |
|  | 2052 | MADE member's investments |                      |  |  | \$ 8,000,000,000.00  |  |
|  |      | MADE operating cost       | \$ 3,200,000,000.00  |  |  |                      |  |
|  |      | Spacecraft manufacturing  | \$ 1,500,000,000.00  |  |  |                      |  |
|  |      | Manned Missions           | \$ 12,850,000,000.00 |  |  |                      |  |
|  |      | Broadcasting              |                      |  |  | \$ 1,099,999,998.00  |  |
|  |      | Cargo Missions            | \$ 5,140,000,000.00  |  |  |                      |  |
|  |      | Deterium Mining           |                      |  |  | \$ 746,575,239.06    |  |
|  |      | Martian Soil              |                      |  |  | \$ 5,999,994,000.00  |  |
|  |      | Training program at MADE  | \$ 16,452,000,000.00 |  |  | \$ 43,872,000,000.00 |  |
|  | 2054 | MADE member's investments |                      |  |  | \$ 8,000,000,000.00  |  |

|  |      |                           |                      |  |  |                      |  |
|--|------|---------------------------|----------------------|--|--|----------------------|--|
|  |      | MADE operating cost       | \$ 3,200,000,000.00  |  |  |                      |  |
|  |      | Spacecraft manufacturing  | \$ 1,500,000,000.00  |  |  |                      |  |
|  |      | Manned Missions           | \$ 12,850,000,000.00 |  |  |                      |  |
|  |      | Broadcasting              |                      |  |  | \$ 1,099,999,998.00  |  |
|  |      | Cargo Missions            | \$ 5,782,500,000.00  |  |  |                      |  |
|  |      | Deterium Mining           |                      |  |  | \$ 746,575,239.06    |  |
|  |      | Martian Soil              |                      |  |  | \$ 5,999,994,000.00  |  |
|  |      | Training program at MADE  | \$ 16,452,000,000.00 |  |  | \$ 43,872,000,000.00 |  |
|  | 2056 | MADE member's investments |                      |  |  | \$ 8,000,000,000.00  |  |
|  |      | MADE operating cost       | \$ 3,200,000,000.00  |  |  |                      |  |
|  |      | Spacecraft manufacturing  | \$ 1,500,000,000.00  |  |  |                      |  |
|  |      | Manned Missions           | \$ 12,850,000,000.00 |  |  |                      |  |
|  |      | Broadcasting              |                      |  |  | \$ 1,099,999,998.00  |  |
|  |      | Cargo Missions            | \$ 7,710,000,000.00  |  |  |                      |  |
|  |      | Deterium Mining           |                      |  |  | \$ 746,575,239.06    |  |
|  |      | Martian Soil              |                      |  |  | \$ 5,999,994,000.00  |  |
|  |      | Training program at MADE  | \$ 16,452,000,000.00 |  |  | \$ 43,872,000,000.00 |  |
|  | 2058 | MADE member's investments |                      |  |  | \$ 8,000,000,000.00  |  |
|  |      | MADE operating cost       | \$ 3,200,000,000.00  |  |  |                      |  |
|  |      | Spacecraft manufacturing  | \$ 1,500,000,000.00  |  |  |                      |  |
|  |      | Manned Missions           | \$ 12,850,000,000.00 |  |  |                      |  |
|  |      | Broadcasting              |                      |  |  | \$ 1,099,999,998.00  |  |
|  |      | Cargo Missions            | \$ 2,570,000,000.00  |  |  |                      |  |
|  |      | Deterium Mining           |                      |  |  | \$ 746,575,239.06    |  |
|  |      | Martian Soil              |                      |  |  | \$ 5,999,994,000.00  |  |
|  |      | Training program at MADE  | \$ 16,608,000,000.00 |  |  | \$ 44,288,000,000.00 |  |
|  | 2060 | MADE member's investments |                      |  |  | \$ 8,000,000,000.00  |  |

|  |      |                           |                      |  |  |                      |  |
|--|------|---------------------------|----------------------|--|--|----------------------|--|
|  |      | MADE operating cost       | \$ 3,200,000,000.00  |  |  |                      |  |
|  |      | Spacecraft manufacturing  | \$ 1,500,000,000.00  |  |  |                      |  |
|  |      | Manned Missions           | \$ 12,850,000,000.00 |  |  |                      |  |
|  |      | Broadcasting              |                      |  |  | \$ 1,099,999,998.00  |  |
|  |      | Cargo Missions            | \$ 2,570,000,000.00  |  |  |                      |  |
|  |      | Deuterium Mining          |                      |  |  | \$ 746,575,239.06    |  |
|  |      | Martian Soil              |                      |  |  | \$ 5,999,994,000.00  |  |
|  |      | Training program at MADE  | \$ 16,608,000,000.00 |  |  | \$ 44,288,000,000.00 |  |
|  | 2062 | MADE member's investments |                      |  |  | \$ 8,000,000,000.00  |  |
|  |      | MADE operating cost       | \$ 3,200,000,000.00  |  |  |                      |  |
|  |      | Spacecraft manufacturing  | \$ 1,500,000,000.00  |  |  |                      |  |
|  |      | Manned Missions           | \$ 12,850,000,000.00 |  |  |                      |  |
|  |      | Broadcasting              |                      |  |  | \$ 1,099,999,998.00  |  |
|  |      | Cargo Missions            | \$ 5,140,000,000.00  |  |  |                      |  |
|  |      | Deuterium Mining          |                      |  |  | \$ 746,575,239.06    |  |
|  |      | Martian Soil              |                      |  |  | \$ 5,999,994,000.00  |  |
|  |      | Training program at MADE  | \$ 16,608,000,000.00 |  |  | \$ 44,288,000,000.00 |  |
|  | 2064 | MADE member's investments |                      |  |  | \$ 8,000,000,000.00  |  |
|  |      | MADE operating cost       | \$ 3,200,000,000.00  |  |  |                      |  |
|  |      | Spacecraft manufacturing  | \$ 1,500,000,000.00  |  |  |                      |  |
|  |      | Manned Missions           | \$ 12,850,000,000.00 |  |  |                      |  |
|  |      | Broadcasting              |                      |  |  | \$ 1,099,999,998.00  |  |
|  |      | Cargo Missions            | \$ 5,782,500,000.00  |  |  |                      |  |
|  |      | Deuterium Mining          |                      |  |  | \$ 746,575,239.06    |  |
|  |      | Martian Soil              |                      |  |  | \$ 5,999,994,000.00  |  |
|  |      | Training program at MADE  | \$ 16,608,000,000.00 |  |  | \$ 44,288,000,000.00 |  |
|  | 2066 | MADE member's investments |                      |  |  | \$ 8,000,000,000.00  |  |

|  |      |                           |                      |  |  |                      |  |
|--|------|---------------------------|----------------------|--|--|----------------------|--|
|  |      | MADE operating cost       | \$ 3,200,000,000.00  |  |  |                      |  |
|  |      | Spacecraft manufacturing  | \$ 1,500,000,000.00  |  |  |                      |  |
|  |      | Manned Missions           | \$ 12,850,000,000.00 |  |  |                      |  |
|  |      | Broadcasting              |                      |  |  | \$ 1,099,999,998.00  |  |
|  |      | Cargo Missions            | \$ 7,710,000,000.00  |  |  |                      |  |
|  |      | Deuterium Mining          |                      |  |  | \$ 746,575,239.06    |  |
|  |      | Martian Soil              |                      |  |  | \$ 5,999,994,000.00  |  |
|  |      | Training program at MADE  | \$ 16,608,000,000.00 |  |  | \$ 44,288,000,000.00 |  |
|  | 2068 | MADE member's investments |                      |  |  | \$ 8,000,000,000.00  |  |
|  |      | MADE operating cost       | \$ 3,200,000,000.00  |  |  |                      |  |
|  |      | Spacecraft manufacturing  | \$ 1,500,000,000.00  |  |  |                      |  |
|  |      | Manned Missions           | \$ 12,850,000,000.00 |  |  | \$ 1,099,999,998.00  |  |
|  |      | Cargo Missions            | \$ 2,570,000,000.00  |  |  |                      |  |
|  |      | Deuterium Mining          |                      |  |  | \$ 746,575,239.06    |  |
|  |      | Martian Soil              |                      |  |  | \$ 5,999,994,000.00  |  |
|  |      | Training program at MADE  | \$ 16,608,000,000.00 |  |  | \$ 44,288,000,000.00 |  |
|  | 2070 | MADE member's investments |                      |  |  | \$ 8,000,000,000.00  |  |
|  |      | MADE operating cost       | \$ 3,200,000,000.00  |  |  |                      |  |
|  |      | Spacecraft manufacturing  | \$ 1,500,000,000.00  |  |  |                      |  |
|  |      | Manned Missions           | \$ 12,850,000,000.00 |  |  |                      |  |
|  |      | Broadcasting              |                      |  |  | \$ 1,099,999,998.00  |  |
|  |      | Cargo Missions            | \$ 2,570,000,000.00  |  |  |                      |  |
|  |      | Deuterium Mining          |                      |  |  | \$ 746,575,239.06    |  |
|  |      | Martian Soil              |                      |  |  | \$ 5,999,994,000.00  |  |
|  |      | Training program at MADE  | \$ 20,874,000,000.00 |  |  | \$ 55,664,000,000.00 |  |
|  | 2072 | MADE member's investments |                      |  |  | \$ 8,000,000,000.00  |  |
|  |      | MADE operating cost       | \$ 3,200,000,000.00  |  |  |                      |  |

|  |      |                           |                      |  |  |                      |  |
|--|------|---------------------------|----------------------|--|--|----------------------|--|
|  |      | Spacecraft manufacturing  | \$ 1,500,000,000.00  |  |  |                      |  |
|  |      | Manned Missions           | \$ 12,850,000,000.00 |  |  |                      |  |
|  |      | Broadcasting              |                      |  |  | \$ 1,099,999,998.00  |  |
|  |      | Cargo Missions            | \$ 5,140,000,000.00  |  |  |                      |  |
|  |      | Deuterium Mining          |                      |  |  | \$ 746,575,239.06    |  |
|  |      | Martian Soil              |                      |  |  | \$ 5,999,994,000.00  |  |
|  |      | Training program at MADE  | \$ 25,140,000,000.00 |  |  | \$ 67,040,000,000.00 |  |
|  | 2074 | MADE member's investments |                      |  |  | \$ 8,000,000,000.00  |  |
|  |      | MADE operating cost       | \$ 3,200,000,000.00  |  |  |                      |  |
|  |      | Spacecraft manufacturing  | \$ 1,500,000,000.00  |  |  |                      |  |
|  |      | Manned Missions           | \$ 16,062,500,000.00 |  |  |                      |  |
|  |      | Broadcasting              |                      |  |  | \$ 1,099,999,998.00  |  |
|  |      | Cargo Missions            | \$ 5,782,500,000.00  |  |  |                      |  |
|  |      | Deuterium Mining          |                      |  |  | \$ 746,575,239.06    |  |
|  |      | Martian Soil              |                      |  |  | \$ 5,999,994,000.00  |  |
|  |      | Training program at MADE  | \$ 25,140,000,000.00 |  |  | \$ 67,040,000,000.00 |  |
|  | 2076 | MADE member's investments |                      |  |  | \$ 8,000,000,000.00  |  |
|  |      | MADE operating cost       | \$ 3,200,000,000.00  |  |  |                      |  |
|  |      | Spacecraft manufacturing  | \$ 1,500,000,000.00  |  |  |                      |  |
|  |      | Manned Missions           | \$ 19,275,000,000.00 |  |  |                      |  |
|  |      | Broadcasting              |                      |  |  | \$ 1,099,999,998.00  |  |
|  |      | Cargo Missions            | \$ 7,710,000,000.00  |  |  |                      |  |
|  |      | Deuterium Mining          |                      |  |  | \$ 746,575,239.06    |  |
|  |      | Martian Soil              |                      |  |  | \$ 5,999,994,000.00  |  |
|  |      | Training program at MADE  | \$ 25,140,000,000.00 |  |  | \$ 67,040,000,000.00 |  |
|  | 2078 | MADE member's investments |                      |  |  | \$ 8,000,000,000.00  |  |
|  |      | MADE operating cost       | \$ 3,200,000,000.00  |  |  |                      |  |

|  |      |                           |                      |  |  |                      |  |
|--|------|---------------------------|----------------------|--|--|----------------------|--|
|  |      | Spacecraft manufacturing  | \$ 1,500,000,000.00  |  |  |                      |  |
|  |      | Manned Missions           | \$ 19,275,000,000.00 |  |  |                      |  |
|  |      | Broadcasting              |                      |  |  | \$ 1,099,999,998.00  |  |
|  |      | Cargo Missions            | \$ 2,570,000,000.00  |  |  |                      |  |
|  |      | Deuterium Mining          |                      |  |  | \$ 746,575,239.06    |  |
|  |      | Martian Soil              |                      |  |  | \$ 5,999,994,000.00  |  |
|  |      | Training program at MADE  | \$ 25,140,000,000.00 |  |  | \$ 67,040,000,000.00 |  |
|  | 2080 | MADE member's investments |                      |  |  | \$ 8,000,000,000.00  |  |
|  |      | MADE operating cost       | \$ 3,200,000,000.00  |  |  |                      |  |
|  |      | Spacecraft manufacturing  | \$ 1,500,000,000.00  |  |  |                      |  |
|  |      | Manned Missions           | \$ 19,275,000,000.00 |  |  |                      |  |
|  |      | Broadcasting              |                      |  |  | \$ 1,099,999,998.00  |  |
|  |      | Cargo Missions            | \$ 2,570,000,000.00  |  |  |                      |  |
|  |      | Deuterium Mining          |                      |  |  | \$ 746,575,239.06    |  |
|  |      | Martian Soil              |                      |  |  | \$ 5,999,994,000.00  |  |
|  |      | Training program at MADE  | \$ 25,140,000,000.00 |  |  | \$ 67,040,000,000.00 |  |
|  | 2082 | MADE member's investments |                      |  |  | \$ 8,000,000,000.00  |  |
|  |      | MADE operating cost       | \$ 3,200,000,000.00  |  |  |                      |  |
|  |      | Spacecraft manufacturing  | \$ 1,500,000,000.00  |  |  |                      |  |
|  |      | Manned Missions           | \$ 19,275,000,000.00 |  |  |                      |  |
|  |      | Broadcasting              |                      |  |  | \$ 1,099,999,998.00  |  |
|  |      | Cargo Missions            | \$ 2,570,000,000.00  |  |  |                      |  |
|  |      | Deuterium Mining          |                      |  |  | \$ 746,575,239.06    |  |
|  |      | Martian Soil              |                      |  |  | \$ 5,999,994,000.00  |  |
|  |      | Training program at MADE  | \$ 25,140,000,000.00 |  |  | \$ 67,040,000,000.00 |  |
|  | 2084 | Broadcasting              |                      |  |  | \$ 29,699,999,946.00 |  |
|  |      | MADE member's investments |                      |  |  | \$ 8,000,000,000.00  |  |

|                     |      |                          |                      |  |  |                      |  |
|---------------------|------|--------------------------|----------------------|--|--|----------------------|--|
|                     |      | MADE operating cost      | \$ 3,200,000,000.00  |  |  |                      |  |
|                     |      | Spacecraft manufacturing | \$ 1,500,000,000.00  |  |  |                      |  |
|                     |      | Manned Missions          | \$ 19,275,000,000.00 |  |  |                      |  |
|                     |      | Cargo Missions           |                      |  |  |                      |  |
|                     |      | Deuterium Mining         |                      |  |  | \$ 746,575,239.06    |  |
|                     |      | Martian Soil             |                      |  |  | \$ 5,999,994,000.00  |  |
|                     |      | Tourism                  |                      |  |  | \$ 62,360,023,071.75 |  |
|                     |      | Research Visit           |                      |  |  | \$ 1,782,826,340.00  |  |
|                     |      | Asteroid Mining          |                      |  |  | \$ 36,745,500,000.00 |  |
|                     |      | Training program at MADE | \$ 25,140,000,000.00 |  |  | \$ 67,040,000,000.00 |  |
| <b>PayBack Time</b> |      |                          |                      |  |  |                      |  |
|                     |      | Broadcasting             |                      |  |  | \$ 29,699,999,946.00 |  |
|                     |      | MADE operating cost      | \$ 3,200,000,000.00  |  |  |                      |  |
|                     |      | Spacecraft manufacturing | \$ 1,500,000,000.00  |  |  |                      |  |
|                     |      | Manned Missions          | \$ 19,275,000,000.00 |  |  |                      |  |
|                     |      | Cargo Missions           |                      |  |  |                      |  |
|                     | 2086 | Deuterium Mining         |                      |  |  | \$ 746,575,239.06    |  |
|                     |      | Martian Soil             |                      |  |  | \$ 5,999,994,000.00  |  |
|                     |      | Tourism                  |                      |  |  | \$ 62,360,023,071.75 |  |
|                     |      | Research Visit           |                      |  |  | \$ 1,782,826,340.00  |  |
|                     |      | Asteroid Mining          |                      |  |  | \$ 36,745,500,000.00 |  |
|                     |      | Training program at MADE | \$ 25,140,000,000.00 |  |  | \$ 67,040,000,000.00 |  |
|                     |      | Broadcasting             |                      |  |  | \$ 29,699,999,946.00 |  |
|                     |      | MADE operating cost      | \$ 3,200,000,000.00  |  |  |                      |  |
|                     |      | Spacecraft manufacturing | \$ 1,500,000,000.00  |  |  |                      |  |
|                     |      | Manned Missions          | \$ 19,275,000,000.00 |  |  |                      |  |
|                     |      | Cargo Missions           |                      |  |  |                      |  |
|                     | 2088 |                          |                      |  |  |                      |  |



|  |      |                          |                      |  |  |                      |  |
|--|------|--------------------------|----------------------|--|--|----------------------|--|
|  |      | Deuterium Mining         |                      |  |  | \$ 746,575,239.06    |  |
|  |      | Martian Soil             |                      |  |  | \$ 5,999,994,000.00  |  |
|  |      | Tourism                  |                      |  |  | \$ 62,360,023,071.75 |  |
|  |      | Research Visit           |                      |  |  | \$ 1,782,826,340.00  |  |
|  |      | Asteroid Mining          |                      |  |  | \$ 36,745,500,000.00 |  |
|  |      | Training program at MADE | \$ 25,140,000,000.00 |  |  | \$ 67,040,000,000.00 |  |
|  |      | Broadcasting             |                      |  |  | \$ 29,699,999,946.00 |  |
|  |      | MADE operating cost      | \$ 3,200,000,000.00  |  |  |                      |  |
|  |      | Spacecraft manufacturing | \$ 1,500,000,000.00  |  |  |                      |  |
|  |      | Manned Missions          | \$ 19,275,000,000.00 |  |  |                      |  |
|  |      | Cargo Missions           |                      |  |  |                      |  |
|  | 2090 | Deuterium Mining         |                      |  |  | \$ 746,575,239.06    |  |
|  |      | Martian Soil             |                      |  |  | \$ 5,999,994,000.00  |  |
|  |      | Tourism                  |                      |  |  | \$ 62,360,023,071.75 |  |
|  |      | Research Visit           |                      |  |  | \$ 1,782,826,340.00  |  |
|  |      | Asteroid Mining          |                      |  |  | \$ 36,745,500,000.00 |  |
|  |      | Training program at MADE | \$ 25,140,000,000.00 |  |  | \$ 67,040,000,000.00 |  |
|  |      | Broadcasting             |                      |  |  | \$ 29,699,999,946.00 |  |
|  |      | MADE operating cost      | \$ 3,200,000,000.00  |  |  |                      |  |
|  |      | Spacecraft manufacturing | \$ 1,500,000,000.00  |  |  |                      |  |
|  |      | Manned Missions          | \$ 19,275,000,000.00 |  |  |                      |  |
|  |      | Cargo Missions           |                      |  |  |                      |  |
|  | 2092 | Deuterium Mining         |                      |  |  | \$ 746,575,239.06    |  |
|  |      | Martian Soil             |                      |  |  | \$ 5,999,994,000.00  |  |
|  |      | Tourism                  |                      |  |  | \$ 62,360,023,071.75 |  |
|  |      | Research Visit           |                      |  |  | \$ 1,782,826,340.00  |  |
|  |      | Asteroid Mining          |                      |  |  | \$ 36,745,500,000.00 |  |

---

|  |  |                          |                      |  |  |                      |  |
|--|--|--------------------------|----------------------|--|--|----------------------|--|
|  |  | Training program at MADE | \$ 25,140,000,000.00 |  |  | \$ 67,040,000,000.00 |  |
|--|--|--------------------------|----------------------|--|--|----------------------|--|

**Supplementary Materi S7. Cargo Missions**

Table S7. The details of the Cargo missions to the colony.

| CARGO MISSIONS      |      |                 |        |                     |                   |                    |                     |        |
|---------------------|------|-----------------|--------|---------------------|-------------------|--------------------|---------------------|--------|
| Colonization Status | Year | No. of Missions |        | Payload per Mission | Payload Each Year | Cumulative Payload | Cumulative Missions |        |
|                     |      | Cargo           | Manned |                     |                   |                    | Cargo               | Manned |
|                     | 2032 | 4               | 1      | 100                 | 400               | 400                | 4                   | 1      |
|                     | 2033 | 4               | 1      | 100                 | 400               | 800                | 8                   | 2      |
|                     | 2034 | 5               | 1      | 100                 | 500               | 1300               | 13                  | 3      |
|                     | 2035 | 4               | 1      | 100                 | 400               | 1700               | 17                  | 4      |
|                     | 2036 | 6               | 1      | 100                 | 600               | 2300               | 23                  | 5      |
|                     | 2037 | 6               | 1      | 100                 | 600               | 2900               | 29                  | 6      |
|                     | 2038 | 2               | 1      | 100                 | 200               | 3100               | 31                  | 7      |
|                     | 2039 | 2               | 1      | 100                 | 200               | 3300               | 33                  | 8      |
|                     | 2040 | 2               | 10     | 106                 | 212               | 3512               | 35                  | 18     |
|                     | 2041 | 2               | 10     | 106                 | 212               | 3724               | 37                  | 28     |
|                     | 2042 | 4               | 10     | 106                 | 424               | 4148               | 41                  | 38     |
|                     | 2043 | 4               | 10     | 106                 | 424               | 4572               | 45                  | 48     |
|                     | 2044 | 5               | 10     | 106                 | 530               | 5102               | 50                  | 58     |
|                     | 2045 | 4               | 10     | 106                 | 424               | 5526               | 54                  | 68     |
|                     | 2046 | 6               | 10     | 106                 | 636               | 6162               | 60                  | 78     |
|                     | 2047 | 6               | 10     | 106                 | 636               | 6798               | 66                  | 88     |
|                     | 2048 | 2               | 10     | 106                 | 212               | 7010               | 68                  | 98     |
|                     | 2049 | 2               | 10     | 106                 | 212               | 7222               | 70                  | 108    |
|                     | 2050 | 2               | 10     | 106                 | 212               | 7434               | 72                  | 118    |
|                     | 2051 | 2               | 10     | 108                 | 216               | 7650               | 74                  | 128    |
|                     | 2052 | 4               | 10     | 108                 | 432               | 8082               | 78                  | 138    |
|                     | 2053 | 4               | 10     | 108                 | 432               | 8514               | 82                  | 148    |

|  |      |   |    |     |     |       |     |     |
|--|------|---|----|-----|-----|-------|-----|-----|
|  | 2054 | 5 | 10 | 108 | 540 | 9054  | 87  | 158 |
|  | 2055 | 4 | 10 | 108 | 432 | 9486  | 91  | 168 |
|  | 2056 | 6 | 10 | 108 | 648 | 10134 | 97  | 178 |
|  | 2057 | 6 | 10 | 108 | 648 | 10782 | 103 | 188 |
|  | 2058 | 2 | 10 | 108 | 216 | 10998 | 105 | 198 |
|  | 2059 | 2 | 10 | 108 | 216 | 11214 | 107 | 208 |
|  | 2060 | 2 | 10 | 108 | 216 | 11430 | 109 | 218 |
|  | 2061 | 2 | 10 | 108 | 216 | 11646 | 111 | 228 |
|  | 2062 | 4 | 10 | 109 | 436 | 12082 | 115 | 238 |
|  | 2063 | 4 | 10 | 109 | 436 | 12518 | 119 | 248 |
|  | 2064 | 5 | 10 | 109 | 545 | 13063 | 124 | 258 |
|  | 2065 | 4 | 10 | 109 | 436 | 13499 | 128 | 268 |
|  | 2066 | 6 | 10 | 109 | 654 | 14153 | 134 | 278 |
|  | 2067 | 6 | 10 | 109 | 654 | 14807 | 140 | 288 |
|  | 2068 | 2 | 10 | 109 | 218 | 15025 | 142 | 298 |
|  | 2069 | 2 | 10 | 109 | 218 | 15243 | 144 | 308 |
|  | 2070 | 2 | 10 | 109 | 218 | 15461 | 146 | 318 |
|  | 2071 | 2 | 10 | 109 | 218 | 15679 | 148 | 328 |
|  | 2072 | 4 | 10 | 109 | 436 | 16115 | 152 | 338 |
|  | 2073 | 4 | 10 | 109 | 436 | 16551 | 156 | 348 |
|  | 2074 | 5 | 10 | 109 | 545 | 17096 | 161 | 358 |
|  | 2075 | 4 | 15 | 110 | 440 | 17536 | 165 | 373 |
|  | 2076 | 6 | 15 | 110 | 660 | 18196 | 171 | 388 |
|  | 2077 | 6 | 15 | 110 | 660 | 18856 | 177 | 403 |
|  | 2078 | 2 | 15 | 110 | 220 | 19076 | 179 | 418 |
|  | 2079 | 2 | 15 | 110 | 220 | 19296 | 181 | 433 |
|  | 2080 | 2 | 15 | 110 | 220 | 19516 | 183 | 448 |

|  |      |   |    |     |     |       |     |     |
|--|------|---|----|-----|-----|-------|-----|-----|
|  | 2081 | 2 | 15 | 110 | 220 | 19736 | 185 | 463 |
|  | 2082 | 4 | 15 | 110 | 440 | 20176 | 189 | 478 |
|  | 2083 |   | 15 | 110 |     |       |     | 493 |
|  | 2084 |   | 15 | 110 |     |       |     | 508 |
|  | 2085 |   | 15 | 110 |     |       |     | 523 |
|  | 2086 |   | 15 | 110 |     |       |     | 538 |
|  | 2087 |   | 15 | 110 |     |       |     | 553 |
|  | 2088 |   | 15 | 110 |     |       |     | 568 |
|  | 2089 |   | 15 | 110 |     |       |     | 583 |
|  | 2090 |   | 15 | 110 |     |       |     | 598 |
|  | 2091 |   | 15 | 110 |     |       |     | 613 |
|  | 2092 |   | 15 | 110 |     |       |     | 628 |
|  | 2093 |   | 15 | 110 |     |       |     | 643 |
|  | 2094 |   | 15 | 110 |     |       |     | 658 |
|  | 2095 |   | 15 | 110 |     |       |     | 673 |
|  | 2096 |   | 15 | 110 |     |       |     | 688 |
|  | 2097 |   | 15 | 110 |     |       |     | 703 |
|  | 2098 |   | 15 | 110 |     |       |     | 718 |
|  | 2099 |   | 15 | 110 |     |       |     | 733 |
|  | 2100 |   | 15 | 110 |     |       |     | 748 |
|  | 2101 |   | 15 | 110 |     |       |     | 763 |
|  | 2102 |   | 15 | 110 |     |       |     | 778 |
|  | 2103 |   | 15 | 110 |     |       |     | 793 |
|  | 2104 |   | 15 | 110 |     |       |     | 808 |
|  | 2105 |   | 15 | 110 |     |       |     | 823 |
|  | 2106 |   | 15 | 110 |     |       |     | 838 |
|  | 2107 |   | 15 | 110 |     |       |     | 853 |

|  |      |  |    |     |  |  |      |
|--|------|--|----|-----|--|--|------|
|  | 2108 |  | 15 | 110 |  |  | 868  |
|  | 2109 |  | 15 | 110 |  |  | 883  |
|  | 2110 |  | 15 | 110 |  |  | 898  |
|  | 2111 |  | 15 | 110 |  |  | 913  |
|  | 2112 |  | 15 | 110 |  |  | 928  |
|  | 2113 |  | 15 | 110 |  |  | 943  |
|  | 2114 |  | 15 | 110 |  |  | 958  |
|  | 2115 |  | 15 | 110 |  |  | 973  |
|  | 2116 |  | 15 | 110 |  |  | 988  |
|  | 2117 |  | 15 | 110 |  |  | 1003 |
|  | 2118 |  | 15 | 110 |  |  | 1018 |
|  | 2119 |  | 15 | 110 |  |  | 1033 |
|  | 2120 |  | 15 | 110 |  |  | 1048 |
|  | 2121 |  | 15 | 110 |  |  | 1063 |
|  | 2122 |  | 15 | 110 |  |  | 1078 |
|  | 2123 |  | 15 | 110 |  |  | 1093 |
|  | 2124 |  | 15 | 110 |  |  | 1108 |
|  | 2125 |  | 15 | 120 |  |  | 1123 |
|  | 2126 |  | 15 | 120 |  |  | 1138 |
|  | 2127 |  | 15 | 120 |  |  | 1153 |
|  | 2128 |  | 15 | 120 |  |  | 1168 |
|  | 2129 |  | 15 | 120 |  |  | 1183 |
|  | 2130 |  | 15 | 120 |  |  | 1198 |
|  | 2131 |  | 15 | 120 |  |  | 1213 |
|  | 2132 |  | 15 | 120 |  |  | 1228 |
|  | 2133 |  | 15 | 120 |  |  | 1243 |
|  | 2134 |  | 15 | 120 |  |  | 1258 |

|  |      |  |    |     |  |  |      |
|--|------|--|----|-----|--|--|------|
|  | 2135 |  | 15 | 120 |  |  | 1273 |
|  | 2136 |  | 15 | 120 |  |  | 1288 |
|  | 2137 |  | 15 | 120 |  |  | 1303 |
|  | 2138 |  | 15 | 120 |  |  | 1318 |
|  | 2139 |  | 15 | 120 |  |  | 1333 |
|  | 2140 |  | 15 | 120 |  |  | 1348 |
|  | 2141 |  | 15 | 120 |  |  | 1363 |
|  | 2142 |  | 15 | 120 |  |  | 1378 |
|  | 2143 |  | 15 | 120 |  |  | 1393 |
|  | 2144 |  | 15 | 120 |  |  | 1408 |
|  | 2145 |  | 15 | 120 |  |  | 1423 |
|  | 2146 |  | 15 | 120 |  |  | 1438 |
|  | 2147 |  | 15 | 120 |  |  | 1453 |
|  | 2148 |  | 15 | 120 |  |  | 1468 |
|  | 2149 |  | 15 | 120 |  |  | 1483 |
|  | 2150 |  | 15 | 120 |  |  | 1498 |
|  | 2151 |  | 15 | 120 |  |  | 1513 |
|  | 2152 |  | 15 | 120 |  |  | 1528 |
|  | 2153 |  | 15 | 120 |  |  | 1543 |
|  | 2154 |  | 15 | 120 |  |  | 1558 |
|  | 2155 |  | 15 | 120 |  |  | 1573 |
|  | 2156 |  | 15 | 120 |  |  | 1588 |
|  | 2157 |  | 15 | 120 |  |  | 1603 |
|  | 2158 |  | 15 | 120 |  |  | 1618 |
|  | 2159 |  | 15 | 120 |  |  | 1633 |
|  | 2160 |  | 15 | 120 |  |  | 1648 |
|  | 2161 |  | 15 | 120 |  |  | 1663 |

|  |      |  |    |     |  |  |      |
|--|------|--|----|-----|--|--|------|
|  | 2162 |  | 15 | 120 |  |  | 1678 |
|  | 2163 |  | 15 | 120 |  |  | 1693 |
|  | 2164 |  | 15 | 120 |  |  | 1708 |
|  | 2165 |  | 15 | 120 |  |  | 1723 |
|  | 2166 |  | 15 | 120 |  |  | 1738 |
|  | 2167 |  | 15 | 120 |  |  | 1753 |
|  | 2168 |  | 15 | 120 |  |  | 1768 |
|  | 2169 |  | 15 | 120 |  |  | 1783 |
|  | 2170 |  | 15 | 120 |  |  | 1798 |
|  | 2171 |  | 15 | 120 |  |  | 1813 |
|  | 2172 |  | 15 | 120 |  |  | 1828 |
|  | 2173 |  | 20 | 130 |  |  | 1848 |
|  | 2174 |  | 20 | 130 |  |  | 1868 |
|  | 2175 |  | 20 | 130 |  |  | 1888 |
|  | 2176 |  | 20 | 130 |  |  | 1908 |
|  | 2177 |  | 20 | 130 |  |  | 1928 |
|  | 2178 |  | 20 | 130 |  |  | 1948 |
|  | 2179 |  | 20 | 130 |  |  | 1968 |
|  | 2180 |  | 20 | 130 |  |  | 1988 |
|  | 2181 |  | 20 | 130 |  |  | 2008 |
|  | 2182 |  | 20 | 130 |  |  | 2028 |
|  | 2183 |  | 20 | 130 |  |  | 2048 |
|  | 2184 |  | 20 | 130 |  |  | 2068 |
|  | 2185 |  | 20 | 130 |  |  | 2088 |
|  | 2186 |  | 20 | 130 |  |  | 2108 |
|  | 2187 |  | 20 | 130 |  |  | 2128 |
|  | 2188 |  | 20 | 130 |  |  | 2148 |



|  |      |  |    |     |  |  |      |
|--|------|--|----|-----|--|--|------|
|  | 2189 |  | 20 | 130 |  |  | 2168 |
|  | 2190 |  | 20 | 130 |  |  | 2188 |
|  | 2191 |  | 20 | 130 |  |  | 2208 |
|  | 2192 |  | 20 | 130 |  |  | 2228 |
|  | 2193 |  | 20 | 130 |  |  | 2248 |
|  | 2194 |  | 20 | 130 |  |  | 2268 |
|  | 2195 |  | 20 | 130 |  |  | 2288 |
|  | 2196 |  | 20 | 130 |  |  | 2308 |
|  | 2197 |  | 20 | 130 |  |  | 2328 |
|  | 2198 |  | 20 | 130 |  |  | 2348 |
|  | 2199 |  | 20 | 130 |  |  | 2368 |
|  | 2200 |  | 20 | 130 |  |  | 2388 |
|  | 2201 |  | 20 | 130 |  |  | 2408 |
|  | 2202 |  | 20 | 130 |  |  | 2428 |
|  | 2203 |  | 20 | 130 |  |  | 2448 |
|  | 2204 |  | 20 | 130 |  |  | 2468 |
|  | 2205 |  | 20 | 130 |  |  | 2488 |
|  | 2206 |  | 20 | 130 |  |  | 2508 |
|  | 2207 |  | 20 | 130 |  |  | 2528 |
|  | 2208 |  | 20 | 130 |  |  | 2548 |
|  | 2209 |  | 20 | 130 |  |  | 2568 |
|  | 2210 |  | 20 | 130 |  |  | 2588 |
|  | 2211 |  | 20 | 130 |  |  | 2608 |
|  | 2212 |  | 20 | 130 |  |  | 2628 |
|  | 2213 |  | 20 | 130 |  |  | 2648 |
|  | 2214 |  | 20 | 130 |  |  | 2668 |
|  | 2215 |  | 20 | 130 |  |  | 2688 |

---

|  |      |  |    |     |  |  |  |      |
|--|------|--|----|-----|--|--|--|------|
|  | 2216 |  | 20 | 130 |  |  |  | 2708 |
|  | 2217 |  | 20 | 130 |  |  |  | 2728 |
|  | 2218 |  | 20 | 130 |  |  |  | 2748 |

**Supplementary Materi S8. Asteroid Mining**

Table S8. The details of the Asteroid Mining missions to the colony.

|                                                 |           |       |   |                                        |        |       |        |
|-------------------------------------------------|-----------|-------|---|----------------------------------------|--------|-------|--------|
| Mass Ratio, from Mars=                          | 4.463     |       |   |                                        |        |       |        |
|                                                 |           |       |   |                                        |        |       |        |
| Frequency =                                     | 2.75      |       |   |                                        |        |       |        |
| Payload To Asteroid Belt =                      | 3750000   | kg    | = | 3750                                   | tonnes |       |        |
| Total Dry Mass =                                | 750000    | kg    | = | 750                                    | tonnes |       |        |
| Total propellant to and from the asteroid =     | 26491950  | kg    | = | 26491.95                               | tonnes |       |        |
| Tankage weight =                                | 18544365  | kg    | = | 18544.365                              | tonnes |       |        |
| Total Mass one way (with asteroid propellant) = | 49536315  | kg    | = | 49536.315                              | tonnes |       |        |
| <b>for CERES taken as a ref</b>                 |           |       |   |                                        |        |       |        |
| Mass Ratio Required =                           | 1.35      |       |   |                                        |        |       |        |
| del v Required                                  | 2.7       | kg/s2 |   |                                        |        |       |        |
| Payload from 16 pshye                           | 7500000   | kg    |   |                                        |        |       |        |
| Total Dry Mass                                  | 1500000   | kg    | = | 1500                                   | tonnes |       |        |
| Propellant Mass                                 | 3150000   | kg    | = | 3150                                   | tonnes |       |        |
| Total Payload brought =                         | 20625000  | kg    | = | 20625                                  | tonnes |       |        |
| At 75% Efficiently Processing =                 | 15468750  | kg    | = | 15468.75                               | tonnes |       |        |
|                                                 |           |       |   |                                        |        |       |        |
| At 25% Platinum =                               | 3867187.5 | kg    | = | 3867.1875                              | tonnes |       |        |
| Remaining Pay load =                            | 38671875  | kg    | = | 38671.875                              | tonnes |       |        |
|                                                 |           |       |   |                                        |        |       |        |
| Number of Transits =                            | 4.25      |       |   | per year                               |        |       |        |
| Kg that can be trasported per trip =            | 150000    | kg    |   |                                        | =      | 150   | tonnes |
| Kg that can be trasported per year =            | 637500    | kg    |   |                                        | =      | 637.5 | tonnes |
| Dry Mass =                                      | 85000     | kg    |   | Assumption: 2 cargo ships every 2 year | =      | 85    | tonnes |
| Propellant Mass =                               | 650000    | kg    |   | Assumption: 85000kg can be transported | =      | 650   | tonnes |

|                                        |                          |           |   |  |   |     |        |
|----------------------------------------|--------------------------|-----------|---|--|---|-----|--------|
|                                        |                          |           |   |  | = |     |        |
| Total Mass of the S/c =                | 885000                   | kg        |   |  | = | 885 | tonnes |
|                                        |                          |           |   |  |   |     |        |
| Cost of Platinum on Earth =            | 30,000.00                | \$        |   |  |   |     |        |
| Cost of Transport Per ship =           | 177000000                | \$        |   |  |   |     |        |
| Cost of Transport Per Year =           | 752250000                | \$        |   |  |   |     |        |
| Estimated Cost of our payload =        | 19,125,000,000.00        | \$        |   |  |   |     |        |
| Remaining Platinum=                    | 42,187.50                | kg        | = |  |   |     |        |
|                                        |                          |           |   |  |   |     |        |
| <b>Revenue generated in one year =</b> | <b>18,372,750,000.00</b> | <b>\$</b> |   |  |   |     |        |

### Supplementary Materi S9. Tourism

Table S9. The details of the tourism missions to the colony.

| TOURISM COST SCHEME          |       |             |       |                             |                         |        |         |
|------------------------------|-------|-------------|-------|-----------------------------|-------------------------|--------|---------|
|                              |       |             |       | No. of tourists (per trip)= | 127                     | people |         |
| Mass Ratio, from Mars=       | 4.463 |             |       | Number of days travel =     | 206.7                   |        |         |
|                              |       |             |       | Payload per person=         | 785.45                  | kg     |         |
| Total dry mass =             |       | 85000       | kg    | Total payload weight =      | 99752.15                | kg     |         |
| Propellant, from Mars=       |       | 639796.6955 | kg    |                             |                         |        |         |
| Propellant, from Earth       |       | 1100000     | kg    | Frequency =                 | 3                       | in     | 1 years |
|                              |       |             |       |                             |                         |        |         |
| Total Weight S/C from Earth= |       | 1284752.15  | kg    |                             |                         |        |         |
| Total Weight S/C from Mars=  |       | 824548.8455 | kg    |                             |                         |        |         |
|                              |       |             |       |                             |                         |        |         |
|                              |       |             |       |                             |                         |        |         |
| Rate of exports from E =     |       | 500         | \$/kg |                             |                         |        |         |
| Rate of exports from M =     |       | 200         | \$/kg |                             | Number of people a year |        | 1095    |

|                                 |       |                |       |                             |             |        |             |       |
|---------------------------------|-------|----------------|-------|-----------------------------|-------------|--------|-------------|-------|
|                                 |       |                |       |                             |             |        |             |       |
|                                 |       |                |       |                             |             |        |             |       |
| Cost from Earh =                |       | 642,376,075.00 | \$    |                             |             |        | 31180011536 |       |
| Cost from Mars =                |       | 164909769.1    | \$    |                             |             |        |             |       |
| Total Cost (per trip) =         |       | 807,285,844.09 | \$    |                             |             |        |             |       |
|                                 |       |                |       |                             |             |        |             |       |
| Cost per tourist (per trip) =   |       | 6,356,581.45   | \$    |                             |             |        |             |       |
| SP per tourist (per trip) =     |       | 15,000,000     | \$    |                             |             |        |             |       |
| Revenue generated per tourist = |       | 8,643,419      | \$    |                             |             |        |             |       |
| Total revenue (per trip) =      |       | 1097714156     | \$    |                             |             |        |             |       |
| <b>TOTAL REVENUE =</b>          |       | 3293142468     | \$    |                             |             |        |             |       |
|                                 |       |                |       |                             |             |        |             |       |
| <b>Tourist Cost Scheme -B</b>   |       |                |       |                             |             |        |             |       |
|                                 |       |                |       | No. of tourists (per trip)= | 85          | people |             |       |
| Mass Ratio, from Mars=          | 4.463 |                |       | Number of days travel =     | 320.7272727 |        |             |       |
|                                 |       |                |       | Payload per person=         | 1184.545455 | kg     |             |       |
| Total dry mass =                |       | 85000          | kg    | Total payload weight =      | 100686.3636 | kg     |             |       |
| Propellant, from Mars=          |       | 643031.8773    | kg    |                             |             |        |             |       |
| Propellant, from Earth          |       | 1100000        | kg    | Frequency =                 | 3           | in     | 1           | years |
|                                 |       |                |       |                             |             |        |             |       |
| Total Weight S/C from Earth=    |       | 1285686.364    | kg    |                             |             |        |             |       |
| Total Weight S/C from Mars=     |       | 828718.2409    | kg    |                             |             |        |             |       |
|                                 |       |                |       |                             |             |        |             |       |
|                                 |       |                |       |                             |             |        |             |       |
| Rate of exports from E =        |       | 500            | \$/kg |                             |             |        |             |       |
| Rate of exports from M =        |       | 200            | \$/kg |                             |             |        |             |       |
|                                 |       |                |       |                             |             |        |             |       |
| Cost from Earh =                |       | 642843181.8    | \$    |                             |             |        |             |       |

|                                 |       |             |       |                             |             |        |   |       |
|---------------------------------|-------|-------------|-------|-----------------------------|-------------|--------|---|-------|
| Cost from Mars =                |       | 165743648.2 | \$    |                             |             |        |   |       |
| Total Cost (per trip) =         |       | 808586830   | \$    |                             |             |        |   |       |
|                                 |       |             |       |                             |             |        |   |       |
| Cost per tourist (per trip) =   |       | 9512786.235 | \$    |                             |             |        |   |       |
| SP per tourist (per trip) =     |       | 18000000    | \$    |                             |             |        |   |       |
| Revenue generated per tourist = |       | 8487213.765 | \$    |                             |             |        |   |       |
| Total revenue (per trip) =      |       | 721413170   | \$    |                             |             |        |   |       |
| <b>TOTAL REVENUE =</b>          |       | 2164239510  | \$    |                             |             |        |   |       |
|                                 |       |             |       |                             |             |        |   |       |
|                                 |       |             |       |                             |             |        |   |       |
|                                 |       |             |       | No. of tourists (per trip)= | 126         | people |   |       |
| Mass Ratio, from Mars=          | 4.463 |             |       | Number of days travel =     | 209.2307692 |        |   |       |
|                                 |       |             |       | Payload per person=         | 794.3076923 | kg     |   |       |
| Total dry mass =                |       | 85000       | kg    | Total payload weight =      | 100082.7692 | kg     |   |       |
| Propellant, from Mars=          |       | 640941.6298 | kg    |                             |             |        |   |       |
| Propellant, from Earth          |       | 1100000     | kg    | Frequency =                 | 3           | in     | 1 | years |
|                                 |       |             |       |                             |             |        |   |       |
| Total Weight S/C from Earth=    |       | 1285082.769 | kg    |                             |             |        |   |       |
| Total Weight S/C from Mars=     |       | 826024.3991 | kg    |                             |             |        |   |       |
|                                 |       |             |       |                             |             |        |   |       |
|                                 |       |             |       |                             |             |        |   |       |
| Rate of exports from E =        |       | 500         | \$/kg |                             |             |        |   |       |
| Rate of exports from M =        |       | 200         | \$/kg |                             |             |        |   |       |
|                                 |       |             |       |                             |             |        |   |       |
| Cost from Earh =                |       | 642541384.6 | \$    |                             |             |        |   |       |
| Cost from Mars =                |       | 165204879.8 | \$    |                             |             |        |   |       |
| Total Cost (per trip) =         |       | 807746264.4 | \$    |                             |             |        |   |       |
|                                 |       |             |       |                             |             |        |   |       |

|                                         |       |             |       |                             |             |        |   |       |
|-----------------------------------------|-------|-------------|-------|-----------------------------|-------------|--------|---|-------|
| Cost per tourist (per trip) =           |       | 6410684.638 | \$    |                             |             |        |   |       |
| SP per tourist (per trip) =             |       | 21000000    | \$    |                             |             |        |   |       |
| Revenue generated per tourist =         |       | 14589315.36 | \$    |                             |             |        |   |       |
| Total revenue (per trip) =              |       | 1838253736  | \$    |                             |             |        |   |       |
| <b>TOTAL REVENUE =</b>                  |       | 5514761207  | \$    |                             |             |        |   |       |
|                                         |       |             |       |                             |             |        |   |       |
| <b>TOURISM COST SCHEME D - 450 days</b> |       |             |       |                             |             |        |   |       |
|                                         |       |             |       | No. of tourists (per trip)= | 80          | people |   |       |
| Mass Ratio, from Mars=                  | 4.463 |             |       | Number of days travel =     | 339.6923077 |        |   |       |
|                                         |       |             |       | Payload per person=         | 1250.923077 | kg     |   |       |
| Total dry mass =                        |       | 85000       | kg    | Total payload weight =      | 100073.8462 | kg     |   |       |
| Propellant, from Mars=                  |       | 640910.7292 | kg    |                             |             |        |   |       |
| Propellant, from Earth                  |       | 1100000     | kg    | Frequency =                 | 3           | in     | 1 | years |
|                                         |       |             |       |                             |             |        |   |       |
| Total Weight S/C from Earth=            |       | 1285073.846 | kg    |                             |             |        |   |       |
| Total Weight S/C from Mars=             |       | 825984.5754 | kg    |                             |             |        |   |       |
|                                         |       |             |       |                             |             |        |   |       |
|                                         |       |             |       |                             |             |        |   |       |
| Rate of exports from E =                |       | 500         | \$/kg |                             |             |        |   |       |
| Rate of exports from M =                |       | 200         | \$/kg |                             |             |        |   |       |
|                                         |       |             |       |                             |             |        |   |       |
| Cost from Earh =                        |       | 642536923.1 | \$    |                             |             |        |   |       |
| Cost from Mars =                        |       | 165196915.1 | \$    |                             |             |        |   |       |
| Total Cost (per trip) =                 |       | 807733838.2 | \$    |                             |             |        |   |       |
|                                         |       |             |       |                             |             |        |   |       |
| Cost per tourist (per trip) =           |       | 10096672.98 | \$    |                             |             |        |   |       |
| SP per tourist (per trip) =             |       | 24000000    | \$    |                             |             |        |   |       |
| Revenue generated per tourist =         |       | 13903327.02 | \$    |                             |             |        |   |       |

|                                         |       |             |       |                             |          |        |   |       |
|-----------------------------------------|-------|-------------|-------|-----------------------------|----------|--------|---|-------|
| Total revenue (per trip) =              |       | 1112266162  | \$    |                             |          |        |   |       |
| <b>TOTAL REVENUE =</b>                  |       | 3336798486  | \$    |                             |          |        |   |       |
|                                         |       |             |       |                             |          |        |   |       |
| <b>TOURISM COST SCHEME D - 450 days</b> |       |             |       |                             |          |        |   |       |
|                                         |       |             |       | No. of tourists (per trip)= | 117      | people |   |       |
| Mass Ratio, from Mars=                  | 4.463 |             |       | Number of days travel =     | 227      |        |   |       |
|                                         |       |             |       | Payload per person=         | 856.5    | kg     |   |       |
| Total dry mass =                        |       | 85000       | kg    | Total payload weight =      | 100210.5 | kg     |   |       |
| Propellant, from Mars=                  |       | 641383.9615 | kg    |                             |          |        |   |       |
| Propellant, from Earth                  |       | 1100000     | kg    | Frequency =                 | 3        | in     | 1 | years |
|                                         |       |             |       |                             |          |        |   |       |
| Total Weight S/C from Earth=            |       | 1285210.5   | kg    |                             |          |        |   |       |
| Total Weight S/C from Mars=             |       | 826594.4615 | kg    |                             |          |        |   |       |
|                                         |       |             |       |                             |          |        |   |       |
|                                         |       |             |       |                             |          |        |   |       |
| Rate of exports from E =                |       | 500         | \$/kg |                             |          |        |   |       |
| Rate of exports from M =                |       | 200         | \$/kg |                             |          |        |   |       |
|                                         |       |             |       |                             |          |        |   |       |
| Cost from Earh =                        |       | 642605250   | \$    |                             |          |        |   |       |
| Cost from Mars =                        |       | 165318892.3 | \$    |                             |          |        |   |       |
| Total Cost (per trip) =                 |       | 807924142.3 | \$    |                             |          |        |   |       |
|                                         |       |             |       |                             |          |        |   |       |
| Cost per tourist (per trip) =           |       | 6905334.55  | \$    |                             |          |        |   |       |
| SP per tourist (per trip) =             |       | 27000000    | \$    |                             |          |        |   |       |
| Revenue generated per tourist =         |       | 20094665.45 | \$    |                             |          |        |   |       |
| Total revenue (per trip) =              |       | 2351075858  | \$    |                             |          |        |   |       |
| <b>TOTAL REVENUE =</b>                  |       | 7053227573  | \$    |                             |          |        |   |       |
|                                         |       |             |       |                             |          |        |   |       |



| TOURISM COST SCHEME D - 450 days |       |               |       |                             |       |        |         |
|----------------------------------|-------|---------------|-------|-----------------------------|-------|--------|---------|
|                                  |       |               |       | No. of tourists (per trip)= | 136   | people |         |
| Mass Ratio, from Mars=           | 4.463 |               |       | Number of days travel =     | 192   |        |         |
|                                  |       |               |       | Payload per person=         | 734   | kg     |         |
| Total dry mass =                 |       | 85000         | kg    | Total payload weight =      | 99824 | kg     |         |
| Propellant, from Mars=           |       | 640045.512    | kg    |                             |       |        |         |
| Propellant, from Earth           |       | 1100000       | kg    | Frequency =                 | 3     | in     | 1 years |
|                                  |       |               |       |                             |       |        |         |
| Total Weight S/C from Earth=     |       | 1284824       | kg    |                             |       |        |         |
| Total Weight S/C from Mars=      |       | 824869.512    | kg    |                             |       |        |         |
|                                  |       |               |       |                             |       |        |         |
|                                  |       |               |       |                             |       |        |         |
| Rate of exports from E =         |       | 500           | \$/kg |                             |       |        |         |
| Rate of exports from M =         |       | 200           | \$/kg |                             |       |        |         |
|                                  |       |               |       |                             |       |        |         |
| Cost from Earh =                 |       | 642412000     | \$    |                             |       |        |         |
| Cost from Mars =                 |       | 164973902.4   | \$    |                             |       |        |         |
| Total Cost (per trip) =          |       | 807385902.4   | \$    |                             |       |        |         |
|                                  |       |               |       |                             |       |        |         |
| Cost per tourist (per trip) =    |       | 5,936,661.05  | \$    |                             |       |        |         |
| SP per tourist (per trip) =      |       | 30000000      | \$    |                             |       |        |         |
| Revenue generated per tourist =  |       | 24,063,338.95 | \$    |                             |       |        |         |
| Total revenue (per trip) =       |       | 3272614098    | \$    |                             |       |        |         |
| <b>TOTAL REVENUE =</b>           |       | 9817842293    | \$    |                             |       |        |         |

## Supplementary Materi S10. Research Visit

Table S10. The details of the research visit mission to the colony.

| Research Visit                     |                  |                             |             |           |
|------------------------------------|------------------|-----------------------------|-------------|-----------|
|                                    |                  | No. of tourists (per trip)= | 85          | people    |
| Mass Ratio, from Mars=             | 4.463            | Number of days travel =     | 320.7272727 |           |
|                                    |                  | Payload per person=         | 1184.545455 | kg        |
| Total dry mass =                   | 85000            | Total payload weight =      | 100686.3636 | kg        |
| The propellant, from Mars=         | 643031.8773      |                             |             | kg        |
| The propellant, from Earth         | 1100000          |                             |             | kg        |
| Total Weight S/C from Earth=       | 1285686.364      |                             |             | kg        |
| Total Weight S/C from Mars=        | 828718.2409      |                             |             | kg        |
| Rate of exports from E =           | 500              |                             |             | \$/kg     |
| Rate of exports from M =           | 200              |                             |             | \$/kg     |
| Cost from Earh =                   | 642843181.8      |                             |             | \$        |
| Cost from Mars =                   | 165743648.2      |                             |             | \$        |
| Total Cost (per trip) =            | 808586830        |                             |             | \$        |
| Cost per Researcher (per trip) =   | 9512786.235      |                             |             | \$        |
| SP per Researcher (per trip) =     | 20000000         |                             |             | \$        |
| Revenue generated per Researcher = | 10487213.76      |                             |             | \$        |
| Total revenue (per trip) =         | 891413170        |                             |             | \$        |
| <b>TOTAL REVENUE =</b>             | <b>891413170</b> |                             |             | <b>\$</b> |

**Author Contributions:** Conceptualization, A.M.; data curation, A.M.; formal analysis, A.M.; funding acquisition, A.M. and H.-C.W.; investigation, A.M.; methodology, A.M.; project administration, A.M. and H.-C.W.; resources, A.M.; software, A.M.; supervision, A.M. and H.-C.W.; validation, A.M.; writing—original draft, A.M.; writing—review and editing, A.M. and H.-C.W. All authors have read and agreed to the published version of the manuscript.

**Funding:** This research was supported by the Ministry of Science and Technology, The Republic of China, under the Grants MOST 108-2823-8-194-002, 109-2622-8-194-001-TE1, and 109-2622-8-194-007. This work was financially/partially supported by the Advanced Institute of Manufacturing with High-tech Innovations and the Center for Innovative Research on Aging Society from The Featured Areas Research Center Program within the framework of the Higher Education Sprout Project by the Ministry of Education in Taiwan.

**Institutional Review Board Statement:** Not applicable

**Acknowledgment:** This study is the response to the Mars Society's international contest for the best design plan for a Mars city-state of 1,000,000 people and was one of the 20 semi-finalists. The list of semi-finalists can be found at <https://www.marssociety.org/news/2020/08/31/semi-finalists-chosen-for-mars-city-state-design-contest/>. It has also been published in the book Mars City States: New Societies for a New World.

**Informed Consent Statement:** Not applicable.

**Conflicts of Interest:** The authors declare no conflict of interest.
